# Supplementary material
Source: HighWire-hosted journal article supplement (https://heart.bmj.com/content/104/4/306)
Supplement: inline-supplementary-material-11 [file inline-supplementary-material-11.pdf]

## Supplementary Data

### Search strategy: PubMed

(mitraclip[All Fields] AND (“mitraclip”[MeSH Terms] OR “mitraclip”[All Fields])) AND (“mitraclip”[MeSH Terms] OR “mitraclip”[All Fields] OR “mitral repair”[tiab] OR “transcatheter mitral valve repair”[tiab] OR “transcatheter mitral valve intervention”[tiab] OR “percutaneous mitral valve repair”[tiab] OR “percutaneous mitral valve intervention”[tiab] OR “transcatheter edge-to-edge repair”[tiab] OR “percutaneous edge-to-edge repair”[tiab] OR “percutaneous edge-to-edge intervention”[tiab] OR “transcatheter edge-to-edge intervention”[tiab] OR “mitral valve repair”[tiab] OR “percutaneous repair”[tiab] OR “transcatheter repair”[tiab]) NOT (animal[mh] NOT human[mh])

## **Legend for supplementary figures**

**Online Figure 1. Risk estimates of failure of acute procedural success for FMR vs DMR.** Forest plot shows results for the acute procedural success. FMR=functional mitral regurgitation; DMR=degenerative mitral regurgitation.

**Online Figure 2. Risk estimates of NYHA class 3-4 for FMR vs DMR.** Forest plot shows results for NYHA class 3-4 at 1 year. FMR=functional mitral regurgitation; DMR=degenerative mitral regurgitation; NYHA=New York Heart Association.

**Online Figure 3. Risk estimates of HF re-hospitalization for FMR vs DMR.** Forest plot shows results for HF re-hospitalization at 1 year. FMR=functional mitral regurgitation; DMR=degenerative mitral regurgitation; HF=heart failure.

**Online Figure 4. As-treated with follow up population. MR grade  $\leq 2$  at 1 year.**

**Online Figure 5. As-treated with follow up population. MV re-intervention at 1 year.**

**Online Figure 6. As-treated with follow up population. Mortality from all-causes at 1 year.**

**Online Figure 7. As-treated with follow up population. NYHA class 3-4 at 1 year.**

**Online Figure 8. As-treated with follow up population. HF re-hospitalization at 1 year.**

**Online Figure 9. Funnel plot for the primary efficacy endpoint of MR grade  $\leq 2$  at 1 year.**

**Online Figure 10. Funnel plot for the primary efficacy endpoint of MV re-intervention at 1 year.**
